# Supplementary material
Source: PubMed Central journal article supplement (PMC5074643)
Supplement: supp_pp.16.00371_PP2016-00371DR1_Supplemental_Figure_S1.pdf [file supp_pp.16.00371_PP2016-00371DR1_Supplemental_Figure_S1.pdf]

Primers UGT33N1F2 and 3300\_N2Ft1 are in the forward orientation whereas primers 3300\_N2Rt1 and UGT33N1R1 are in the reverse orientation.
