# Supplementary material
Source: PubMed Central journal article supplement (PMC5074643)
Supplement: supp_pp.16.00371_PP2016-00371DR1_Supplemental_Figure_S5.pdf [file supp_pp.16.00371_PP2016-00371DR1_Supplemental_Figure_S5.pdf]

No DON

50  $\mu$ M DON

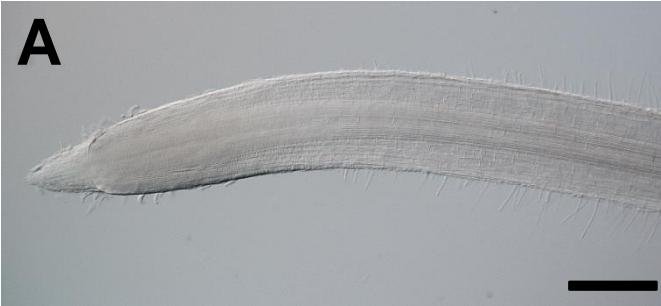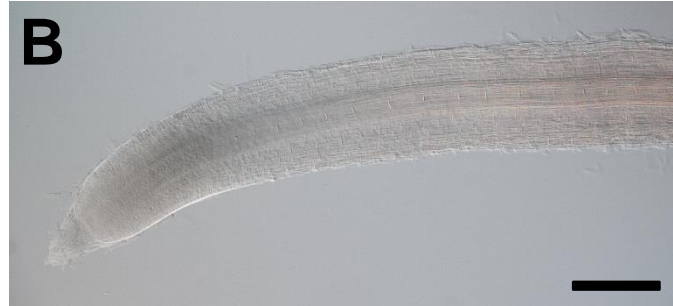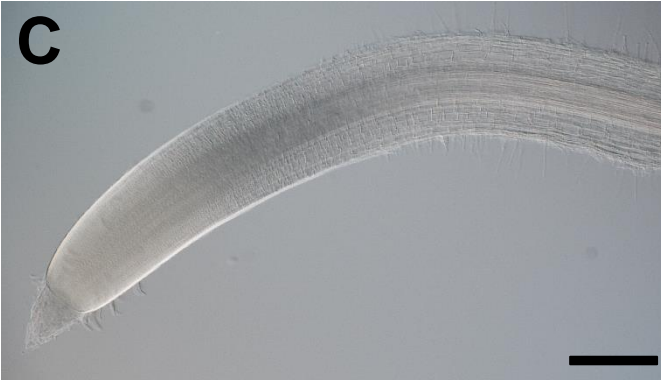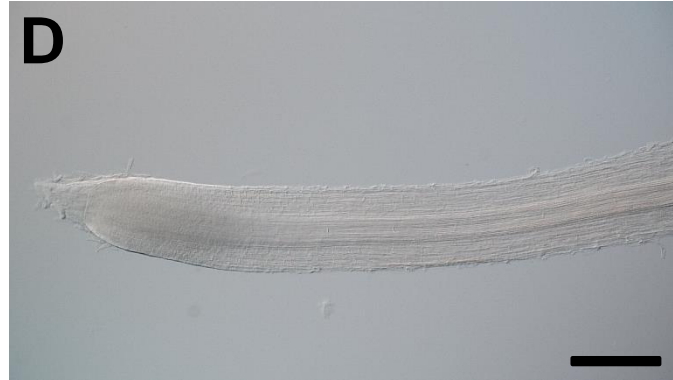

**Supplemental Figure S5.** DON does not induce root apex disorganization in *Bradi5g03300* overexpressing lines. Root apex of the null segregant line (A, B) and the overexpressing line OE - 10 R 14 (C, D) on agar medium without (A, C) or with 50  $\mu$  M DON (B, D) . Bars: 300  $\mu$ m .
