# Supplementary material
Source: PubMed Central journal article supplement (PMC5074643)
Supplement: supp_pp.16.00371_PP2016-00371DR1_Supplemental_Figure_S6.pdf [file supp_pp.16.00371_PP2016-00371DR1_Supplemental_Figure_S6.pdf]

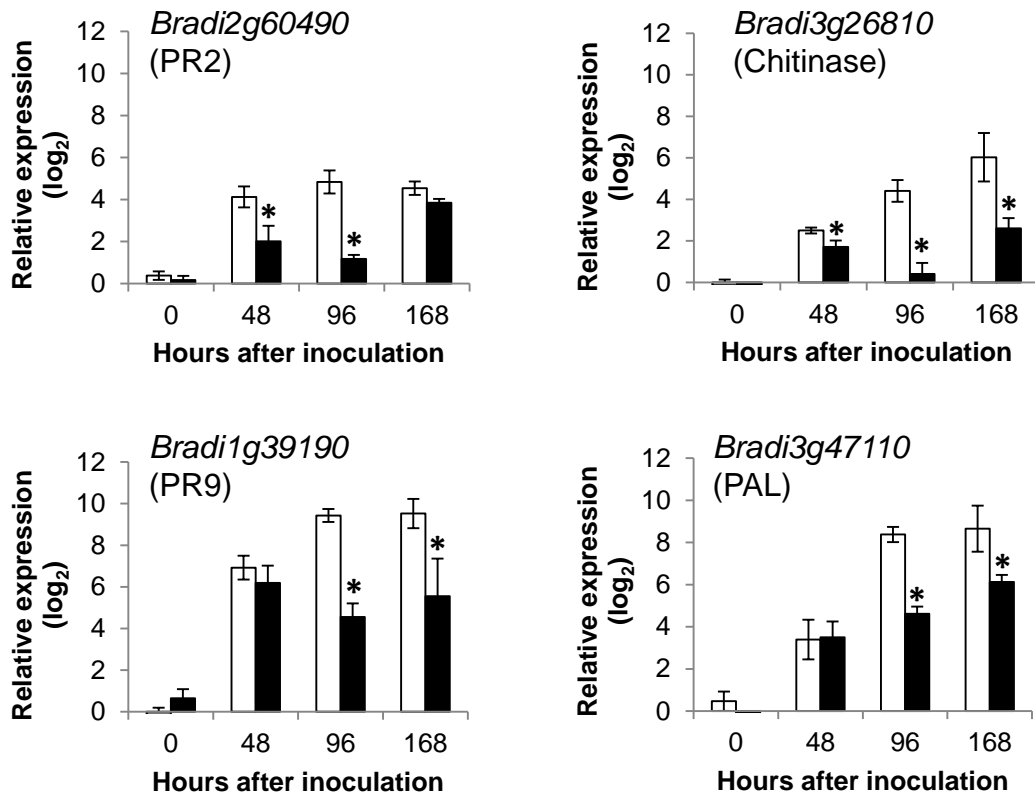

**Supplemental Figure S6.** Relative expression of defense genes in wild-type and OE-10R14 lines after infection by *F. graminearum*. The relative quantity of gene transcripts in wild-type line (Bd21.3, white bars) and in OE line (OE-10R14, black bars) after infection by *F. graminearum* PH1 strain as compared with the mock inoculation was calculated using the comparative cycle threshold method ( $2^{-\Delta\Delta C_t}$ ). *B. distachyon* *UBC18* and *ACT7* gene (*Bradi4g00660* and *Bradi4g41850*) were used as endogenous controls to normalize the data for differences in input RNA between the different samples. Data represent mean values of three independent biological experiments, error bars represent the standard deviation. Asterisks indicate significant differences between genotypes, Student t test ( $p$ -value  $\leq 0.05$ ).
