# Supplementary material
Source: PubMed Central journal article supplement (PMC5074643)
Supplement: supp_pp.16.00371_PP2016-00371DR1_Supplemental_Figure_S8.pdf [file supp_pp.16.00371_PP2016-00371DR1_Supplemental_Figure_S8.pdf]

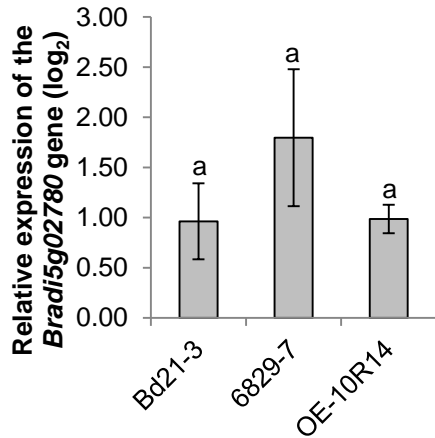

**Supplemental Figure S8.** Relative expression of the UGT-encoding *Bradi5g02780* gene in spikelets of wild-type, mutant and overexpressing lines 48 hours after inoculation by *F. graminearum* *FgDON*<sup>+</sup> strain. The relative quantity of *Bradi5g02780* gene transcripts in spikelets as compared with mock-inoculated spikelets of the wild-type, mutant and overexpressing lines was calculated using the comparative cycle threshold method ( $2^{-\Delta\Delta C_t}$ ). *B. distachyon* *UBC18* and *ACT7* gene (*Bradi4g00660* and *Bradi4g41850*) were used as endogenous controls to normalize the data for differences in input RNA between the different samples. Data represent mean values of three independent biological experiments, error bars represent the standard deviation (different letters indicate significant differences between conditions, Student t test,  $p$ -value  $\leq 0.05$ ).
