# Supplementary material
Source: PubMed Central journal article supplement (PMC5074643)
Supplement: supp_pp.16.00371_PP2016-00371DR1_Supplemental_Table_1.pdf [file supp_pp.16.00371_PP2016-00371DR1_Supplemental_Table_1.pdf]

1 **Supplemental Table 1. Characteristics of the mutant families identified in the**  
 2 ***Bradi5g03300* gene following screening of the Bd21-3 TILLING collection.**  
 3

| Family name | Nucleic acid transition <sup>a</sup> | Amino acid substitution <sup>b</sup> | Mutation type <sup>c</sup> | Location of the mutation |
|-------------|--------------------------------------|--------------------------------------|----------------------------|--------------------------|
| 5617        | G1477A                               | G269S                                | Missense                   | Exon 2                   |
| 6570        | C1542T                               | S290S                                | Silent                     | Exon 2                   |
| 5648        | C1585T                               | L305L                                | Silent                     | Exon 2                   |
| 7273        | G1589A                               | G306E                                | Missense                   | Exon 2                   |
| 3698        | G1660A                               | G330S                                | Missense                   | Exon 2                   |
| 7079        | G1686A                               | K337K                                | Silent                     | Exon 2                   |
| 6829        | G1707A                               | W345*                                | Nonsense                   | Exon 2 (PSPG box)        |
| 7850        | C1726T                               | L352L                                | Silent                     | Exon 2 (PSPG box)        |
| 8156        | C1778T                               | /                                    | /                          | Intron 2                 |
| 3658        | G1792T                               | /                                    | /                          | Intron 2                 |
| 6491        | G1878A                               | W366*                                | Nonsense                   | Exon 3 (PSPG box)        |
| 8637        | C1883T                               | S368F                                | Missense                   | Exon 3 (PSPG box)        |
| 7945        | G1922A                               | G381E                                | Missense                   | Exon 3 (PSPG box)        |
| 3714        | A1923C                               | G381G                                | Silent                     | Exon 3 (PSPG box)        |
| 5775        | G1966A                               | E396K                                | Missense                   | Exon 3                   |

4 <sup>a</sup>Location of the point mutation in mutants are relative to the starting ATG on the genomic DNA sequence.  
 5 <sup>b</sup>Location of the amino acid substitution in mutants are relative to the starting methionine of the encoded protein.  
 6 <sup>c</sup>Missense, nucleic acid transition is a non-synonymous mutation and induce amino acid change in the translated  
 7 protein; Nonsense, nucleic acid transition produces a stop codon and may induce a truncated protein; Silent,  
 8 nucleic acid transition induces a synonymous mutation and therefore no change in the translated protein.  
 9  
 10  
 11
