# Supplementary material
Source: PubMed Central journal article supplement (PMC5074643)
Supplement: supp_pp.16.00371_PP2016-00371DR1_Supplemental_Table_2.pdf [file supp_pp.16.00371_PP2016-00371DR1_Supplemental_Table_2.pdf]

**Supplemental Table 2.** List of primers used in qRT-PCR and qPCR experiments.

| Gene                         | Nucleotide sequence               | Polarity | Putative function                            | Reference              |
|------------------------------|-----------------------------------|----------|----------------------------------------------|------------------------|
| <i>Bradi4g00660</i>          | 5'-ACCCTCTACGCTGGTGAGAC-3'        | Forward  | UBC18 (plant reference gene)                 | Pasquet et al., 2014   |
|                              | 5'-TTGCTGTAAATGTGCGGATG-3'        | Reverse  |                                              |                        |
| <i>Bradi4g41850</i>          | 5'-CCTGAAGTCCTTTTCCAGCC-3'        | Forward  | ACT7 (plant reference gene)                  | Pasquet et al., 2014   |
|                              | 5'-AGGGCAGTGATCTCCTTGCT-3'        | Reverse  |                                              |                        |
| <i>Bradi5g03300</i>          | 5'-AAGAAAAGCTTGAATGGACAATAA-3'    | Forward  | UDP-glycosyltransferase                      | Schweiger et al., 2013 |
|                              | 5'-CGCGTGCATTGTCTCCTT-3'          | Reverse  |                                              |                        |
| <i>Bradi2g60490</i>          | 5'-AGCCATCCAGCTCAACTAC-3'         | Forward  | Pathogenesis-related protein PR2             | Blümke et al., 2014    |
|                              | 5'-CCTTGCCAACATGGTCAATC-3'        | Reverse  |                                              |                        |
| <i>Bradi3g26810</i>          | 5'-GCAAGGGTTCAAGTATGAGA-3'        | Forward  | Pathogenesis-related protein Chitinase       | Pasquet et al., 2014   |
|                              | 5'-ACACCATCACCACCACTC-3'          | Reverse  |                                              |                        |
| <i>Bradi1g39190</i>          | 5'-TCCGACCAGGCTCTCTAC-3'          | Forward  | Pathogenesis-related protein PR9             | Pasquet et al., 2014   |
|                              | 5'-GGTATGTTCCCCATCTTGAC-3'        | Reverse  |                                              |                        |
| <i>Bradi3g47110</i>          | 5'-CCAAACAATTAAGGAGATCAATTAGAA-3' | Forward  | Phenylalanine ammonia-lyase                  | Pasquet et al., 2014   |
|                              | 5'-CCGAATACTGAAAAGTAAGATACA-3'    | Reverse  |                                              |                        |
| 18S<br><i>F. graminearum</i> | 5'-GTCCGGCCGGCCTTTCC-3'           | Forward  | Ribosomal region 18S (fungal reference gene) | Mudge et al., 2006     |
|                              | 5'-AAGTCCTGTTTCCCCGCCACGC-3'      | Reverse  |                                              |                        |

3

4

5
